# Supplementary material for: Fragmentation dynamics and absolute dissociative electron attachment cross sections in the low energy electron collision with ethanol
Source: Royal Society of Chemistry journal article supplement (doi:10.1039/d3cp03601d), 2023-01-01
Supplement: d3cp03601d1.pdf [file d3cp03601d1.pdf]

## Fragmentation dynamics and absolute dissociative electron attachment cross sections in the low energy electron collision with ethanol

Anirban Paul<sup>1†</sup>, Soumya Ghosh<sup>1</sup> and Dhananjay Nandi<sup>1,2\*</sup>

<sup>1</sup> Indian Institute of Science Education and Research Kolkata, Mohanpur 741246, India

<sup>2</sup> Center for Atomic, Molecular and Optical Sciences & Technologies,

Joint initiative of IIT Tirupati & IISER Tirupati, Yerpedu, 517619, Andhra Pradesh, India

email: <sup>†</sup>anirban.paul1995@gmail.com, \*dhananjay@iiserkol.ac.in

Quantum chemical calculations are performed using the GAUSSIAN 16 software.[1] We have obtained the threshold energies for each dissociation pathway using the density functional theory (DFT) B3LYP/aug-cc-pVTZ method. Threshold energies for different dissociation channels are calculated as the differences between the total energies of the products and the targets.

In Tables I, II, and III we have listed the optimized structures and their electronic energy for different neutrals, anions and cations respectively. Table IV and Table V are the calculated threshold energies of different three and many body dissociation channels producing H<sup>-</sup> ions as discussed in the main text.

For the reaction given below:

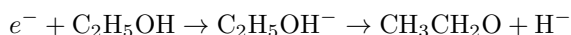

The threshold is calculated by the following way:

$$\begin{aligned} E_{Th} &= E(CH_3CH_2O) + E(H^-) - E(C_2H_5OH) \\ &= [-154.436628 + (-0.535667) - (-155.110261)] \\ &= 0.137966 \text{ H} = 3.75 \text{ eV} \end{aligned}$$

From Table II, we can see that the CH<sub>2</sub>CH<sub>2</sub>OH<sup>-</sup> dissociates during the time of geometry optimization, which suggests that it is unstable to dissociation and spontaneously dissociates to produce more stable C<sub>2</sub>H<sub>4</sub> and OH<sup>-</sup> fragments. Since the CH<sub>2</sub>CH<sub>2</sub>OH<sup>-</sup> is unstable, in Table II, we have mentioned the final optimization energy value. We, therefore, have also calculated the combined energy of C<sub>2</sub>H<sub>4</sub> and OH<sup>-</sup> fragments [-78.624065 + (-75.836271) = -154.460336]. This suggests that the combined energy of these fragments is less than the final optimized energy value (-154.454494 H) of CH<sub>2</sub>CH<sub>2</sub>OH<sup>-</sup>. This again means that the CH<sub>2</sub>CH<sub>2</sub>OH<sup>-</sup> spontaneously dissociates to produce a C<sub>2</sub>H<sub>4</sub> and an OH<sup>-</sup> fragment.

In Tables VI and VII, we have listed the positions of different atoms in the optimized structures of neutrals in Cartesian coordinates. The coordinates of the atoms are copied from the output files of the optimized structures. On the other hand, the Cartesian coordinates of the atoms in the optimized structures of different anions and cations are listed in Tables VIII and IX, respectively.

---

[1] M. J. Frisch, G. W. Trucks, H. B. Schlegel, G. E. Scuseria, M. A. Robb, J. R. Cheeseman, G. Scalmani, V. Barone, G. A. Petersson, H. Nakatsuji, X. Li, M. Caricato, A. V. Marenich, J. Bloino, B. G. Janesko, R. Gomperts, B. Mennucci, H. P. Hratchian, J. V. Ortiz, A. F. Izmaylov, J. L. Sonnenberg, D. Williams-Young, F. Ding, F. Lipparini, F. Egidi, J. Goings, B. Peng, A. Petrone, T. Henderson, D. Ranasinghe, V. G. Zakrzewski, J. Gao, N. Rega, G. Zheng, W. Liang, M. Hada, M. Ehara, K. Toyota, R. Fukuda, J. Hasegawa, M. Ishida, T. Nakajima,

Y. Honda, O. Kitao, H. Nakai, T. Vreven, K. Throssell, J. A. Montgomery, Jr., J. E. Peralta, F. Ogliaro, M. J. Bearpark, J. J. Heyd, E. N. Brothers, K. N. Kudin, V. N. Staroverov, T. A. Keith, R. Kobayashi, J. Normand, K. Raghavachari, A. P. Rendell, J. C. Burant, S. S. Iyengar, J. Tomasi, M. Cossi, J. M. Millam, M. Klene, C. Adamo, R. Cammi, J. W. Ochterski, R. L. Martin, K. Morokuma, O. Farkas, J. B. Foresman and D. J. Fox, *Gaussian 16 Revision C.01*, 2016, Gaussian Inc. Wallingford CT.

TABLE I. Different optimized structures with their electronic energies.

| Species      | Energy (H)  | Optimized Structure | Species     | Energy (H)  | Optimized Structure |
|--------------|-------------|---------------------|-------------|-------------|---------------------|
| $C_2H_5OH$   | -155.110261 |                     | $CH_3CH_2O$ | -154.436628 |                     |
| $CH_2CH_2OH$ | -154.434668 |                     | $CH_3CHOH$  | -154.450633 |                     |
| $CH_2CH_2O$  | -153.852563 |                     | $CH_3CHO$   | -153.89642  |                     |
| $CHCH_2OH$   | -153.79717  |                     | $CH_2CHOH$  | -153.879496 |                     |
| $CH_3COH$    | -153.815297 |                     | $CCH_2OH$   | -153.101394 |                     |
| $CH_2CHO$    | -153.236837 |                     | $CH_2COH$   | -153.198424 |                     |
| $CH_3CO$     | -153.245884 |                     | $CHCH_2O$   | -153.236802 |                     |
| $CHCHOH$     | -153.186805 |                     | $H_2$       | -1.180024   |                     |
| $H$          | -0.50226    |                     | $OH$        | -75.768599  |                     |
| $CH_3CH_3$   | -79.864711  |                     | $CH_3CH_2$  | -79.193142  |                     |
| $O$          | -75.09418   |                     | $CH_2CH_2$  | -78.624065  |                     |
| $CH_3CH$     | -78.501298  |                     | $CH_3C$     | -77.858186  |                     |
| $CH_2CH$     | -77.930594  |                     | $H_2O$      | -76.466197  |                     |

TABLE II. Different optimized structures of anions with their electronic energies.

| Species                            | Energy (H)  | Optimized Structure                                                                 | Species                             | Energy (H)  | Optimized Structure                                                                   |
|------------------------------------|-------------|-------------------------------------------------------------------------------------|-------------------------------------|-------------|---------------------------------------------------------------------------------------|
| $\text{CH}_3\text{CH}_2\text{O}^-$ | -154.496837 |    | $\text{CH}_2\text{CH}_2\text{OH}^-$ | -154.454494 |    |
| $\text{CH}_3\text{CHOH}^-$         | -154.439724 |    | $\text{CH}_2\text{CH}_2\text{O}^-$  | -153.83133  |    |
| $\text{CH}_3\text{CHO}^-$          | -153.881431 |    | $\text{CHCH}_2\text{OH}^-$          | -153.781624 |    |
| $\text{CH}_2\text{CHOH}^-$         | -153.867569 |    | $\text{CH}_3\text{COH}^-$           | -153.79943  |    |
| $\text{CH}_2\text{CHO}^-$          | -153.303989 |    | $\text{CH}_3\text{CH}_2^-$          | -79.184061  |    |
| $\text{H}^-$                       | -0.535667   |  | $\text{OH}^-$                       | -75.836271  |  |
| $\text{O}^-$                       | -75.155815  |  |                                     |             |                                                                                       |

TABLE III. Different optimized structures of cations with their electronic energies.

| Species                            | Energy (H)  | Optimized Structure                                                                | Species                             | Energy (H)  | Optimized Structure                                                                   |
|------------------------------------|-------------|------------------------------------------------------------------------------------|-------------------------------------|-------------|---------------------------------------------------------------------------------------|
| $\text{CH}_3\text{CH}_2\text{O}^+$ | -154.065289 | 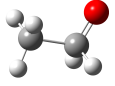  | $\text{CH}_2\text{CH}_2\text{OH}^+$ | -154.132279 |    |
| $\text{CH}_3\text{CHOH}^+$         | -154.202729 |   | $\text{CH}_3\text{CO}^+$            | -152.985149 |    |
| $\text{H}_2^+$                     | -0.610293   |   | $\text{CH}_3\text{CH}_3^+$          | -79.440269  |    |
| $\text{CH}_3\text{CH}_2^+$         | -78.892614  |   | $\text{CH}_2\text{CH}_2^+$          | -78.24378   |    |
| $\text{CH}_3\text{CH}^+$           | -78.193475  |   | $\text{CH}_3\text{C}^+$             | -77.540745  |    |
| $\text{CH}_2\text{CH}^+$           | -77.616958  |  | $\text{H}^+$                        | 0           |  |

TABLE IV. Different three-body dissociation channels producing  $\text{H}^-$  ions and their calculated threshold values.

| Ch. no. | Dissociative products                                    | Threshold energy |
|---------|----------------------------------------------------------|------------------|
| A.1     | $\text{H}^- + \text{CH}_2\text{CH}_2\text{O} + \text{H}$ | 5.98 eV          |
| A.2     | $\text{H}^- + \text{CH}_3\text{CHO} + \text{H}$          | 4.79 eV          |
| A.3     | $\text{H}^- + \text{CHCH}_2\text{OH} + \text{H}$         | 7.49 eV          |
| A.4     | $\text{H}^- + \text{CH}_2\text{CHOH} + \text{H}$         | 5.25 eV          |
| A.5     | $\text{H}^- + \text{CH}_3\text{COH} + \text{H}$          | 6.99 eV          |

TABLE V. Different many-body dissociation channels producing  $\text{H}^-$  ions and their calculated threshold values.

| Ch. no. | Dissociative products                             | Threshold energy |
|---------|---------------------------------------------------|------------------|
| B.1     | $\text{H}^- + \text{CH}_2\text{CHO} + \text{H}_2$ | 4.29 eV          |
| B.2     | $\text{H}^- + \text{CH}_3\text{CO} + \text{H}_2$  | 4.05 eV          |
| B.3     | $\text{H}^- + \text{CH}_2\text{COH} + \text{H}_2$ | 5.34 eV          |
| B.4     | $\text{H}^- + \text{CHCH}_2\text{O} + \text{H}_2$ | 4.29 eV          |
| B.5     | $\text{H}^- + \text{CHCHOH} + \text{H}_2$         | 5.65 eV          |
| B.6     | $\text{H}^- + \text{CHCH}_2 + \text{H}_2\text{O}$ | 4.84 eV          |

TABLE VI. Positions of different atoms in the optimized structures of neutrals in Cartesian coordinates.

| Species                            | Atoms and their coordinates                                                                                                                                                                                                                                                                                                                                | Species                           | Atoms and their coordinates                                                                                                                                                                                                                                                                                               |
|------------------------------------|------------------------------------------------------------------------------------------------------------------------------------------------------------------------------------------------------------------------------------------------------------------------------------------------------------------------------------------------------------|-----------------------------------|---------------------------------------------------------------------------------------------------------------------------------------------------------------------------------------------------------------------------------------------------------------------------------------------------------------------------|
| C <sub>2</sub> H <sub>5</sub> OH   | C 1.17743300 -0.39742000 0.00000000<br>H 1.15400100 -1.03570800 0.88357500<br>H 2.11572000 0.15922200 0.00000000<br>H 1.15400100 -1.03570800 -0.88357500<br>C 0.00000000 0.55409200 0.00000000<br>H 0.03392100 1.19907400 0.88538100<br>H 0.03392100 1.19907400 -0.88538100<br>O -1.19980400 -0.22410700 0.00000000<br>H -1.95772900 0.36686400 0.00000000 | CH <sub>3</sub> CH <sub>2</sub> O | C 1.04308400 -0.60036400 0.00000000<br>H 0.93235200 -1.22963000 0.88320000<br>H 2.05127100 -0.18168800 0.00000000<br>H 0.93235200 -1.22963000 -0.88320000<br>C 0.00000000 0.50738200 0.00000000<br>H 0.12492200 1.18965500 0.86272600<br>H 0.12492200 1.18965500 -0.86272600<br>O -1.30304000 0.10244100 0.00000000       |
| CH <sub>2</sub> CH <sub>2</sub> OH | C -1.26380800 -0.23901200 0.00000000<br>H -1.69080400 -0.59274600 0.92709000<br>H -1.69080400 -0.59274600 -0.92709000<br>C 0.00000000 0.53538400 0.00000000<br>H 0.05228700 1.17525900 0.88708600<br>H 0.05228700 1.17525900 -0.88708600<br>O 1.11614900 -0.38411400 0.00000000<br>H 1.93069300 0.12965200 0.00000000                                      | CH <sub>3</sub> CHOH              | C 1.20839900 -0.18004800 0.01877500<br>H 1.37495800 -0.58395900 1.02951100<br>H 2.03108000 0.49931600 -0.20270300<br>H 1.28155100 -1.02212700 -0.67851700<br>C -0.09051000 0.52510400 -0.10814400<br>H -0.20781900 1.56136000 0.17291000<br>O -1.25975800 -0.17705600 0.04539300<br>H -1.10904300 -1.10848300 -0.14813000 |
| CH <sub>2</sub> CH <sub>2</sub> O  | C 0.73141600 0.37358300 0.00001400<br>H 1.26638700 0.59041000 -0.91802700<br>H 1.26635300 0.59039400 0.91807700<br>C -0.73176400 0.37302800 0.00000200<br>H -1.26702100 0.58957400 0.91788900<br>H -1.26692000 0.58975600 -0.91789600<br>O 0.00041200 -0.85497500 -0.00001700                                                                              | CH <sub>3</sub> CHO               | C -1.16564000 -0.14854200 -0.00003000<br>H -1.70067000 0.22501200 0.87710000<br>H -1.16187700 -1.23580900 -0.00147500<br>H -1.70209100 0.22736600 -0.87515100<br>C 0.23247600 0.39613300 -0.00008800<br>H 0.30613700 1.50368500 0.00002700<br>O 1.23218600 -0.27572500 0.00002600                                         |
| CHCH <sub>2</sub> OH               | C 1.27704800 -0.44142100 -0.00000600<br>H 2.12375700 0.26707100 -0.00001500<br>C 0.10720400 0.39346200 -0.00000500<br>H 0.19850400 1.06842000 0.87675600<br>H 0.19842700 1.06855200 -0.87666500<br>O -1.12241700 -0.30550700 -0.00000400<br>H -1.84686300 0.32776700 0.00002600                                                                            | CH <sub>2</sub> CHOH              | C -1.22353600 -0.17985300 0.00003200<br>H -2.11997900 0.41959800 0.00010000<br>H -1.31875900 -1.25632500 -0.00021200<br>C -0.03824300 0.41237700 -0.00000500<br>H 0.06656100 1.49162800 -0.00017000<br>O 1.13282300 -0.29473700 0.00000900<br>H 1.88027200 0.30784300 0.00004800                                          |
| CH <sub>3</sub> COH                | C -1.16492900 -0.13668700 0.00001900<br>H -1.08137400 -1.22832100 -0.00003600<br>H -1.73990400 0.20258300 -0.86664400<br>H -1.73838000 0.20287500 0.86750900<br>C 0.12503400 0.60581500 -0.00017000<br>O 1.10661500 -0.27448900 -0.00003800<br>H 1.94611000 0.20401300 0.00037900                                                                          | CCH <sub>2</sub> OH               | C -1.39886500 -0.37609500 -0.00000100<br>C -0.18918000 0.39217500 0.00000000<br>H -0.29660700 1.05954400 -0.88002900<br>H -0.29660900 1.05954000 0.88003200<br>O 1.04402800 -0.31661400 0.00000000<br>H 1.76926500 0.31735000 -0.00000400                                                                                 |
| CH <sub>2</sub> CHO                | C -1.16501400 -0.17159100 0.00012900<br>H -1.26771500 -1.24781000 0.00079500<br>H -2.05143600 0.44753000 -0.00169800<br>C 0.13121600 0.40606700 0.00016500<br>H 0.18820100 1.50760300 0.00070700<br>O 1.16671700 -0.26427200 -0.00019700                                                                                                                   | CH <sub>2</sub> COH               | C 1.24106800 -0.10210500 -0.01615600<br>H 1.39882100 -1.16966900 -0.14771100<br>H 2.10566800 0.53730900 0.07373100<br>C 0.02935000 0.40436500 0.00935500<br>O -1.16546900 -0.18347400 0.07389400<br>H -1.80324800 0.28659600 -0.47635900                                                                                  |
| CH <sub>3</sub> CO                 | C 1.16675000 -0.09752200 0.00001900<br>H 1.18500000 -1.18964100 0.00103500<br>H 1.68223000 0.29455200 0.87644000<br>H 1.68149400 0.29282600 -0.87767700<br>C -0.24467900 0.42687000 0.00003000<br>O -1.26014400 -0.17172800 -0.00001100                                                                                                                    | CHCH <sub>2</sub> O               | C 1.16135200 -0.17187200 -0.00062300<br>H 2.05645500 0.43499600 -0.01342900<br>C -0.12883900 0.40899300 0.00316600<br>H 1.25496600 -1.24859000 0.01147000<br>H -0.18795000 1.51161200 0.00463100<br>O -1.16481900 -0.26509300 -0.00224100                                                                                 |

TABLE VII. Positions of different atoms in the optimized structures of neutrals in Cartesian coordinates.

| Species                         | Atoms and their coordinates                                                                                                                                                                                                                                                      | Species                         | Atoms and their coordinates                                                                                                                                                                                                                                                                                             |
|---------------------------------|----------------------------------------------------------------------------------------------------------------------------------------------------------------------------------------------------------------------------------------------------------------------------------|---------------------------------|-------------------------------------------------------------------------------------------------------------------------------------------------------------------------------------------------------------------------------------------------------------------------------------------------------------------------|
| CHCHOH                          | C 1.26061900 -0.27547500 0.00004300<br>H 2.30400600 -0.02664200 -0.00019500<br>C 0.11379900 0.35080000 0.00006800<br>H 0.07695700 1.44131600 -0.00022100<br>O -1.10302400 -0.28051900 -0.00006400<br>H -1.80327400 0.37753500 0.00026100                                         | H <sub>2</sub>                  | H 0.00000000 0.00000000 0.37143200<br>H 0.00000000 0.00000000 -0.37143200                                                                                                                                                                                                                                               |
| OH                              | O 0.00000000 0.00000000 0.10836800<br>H 0.00000000 0.00000000 -0.86694100                                                                                                                                                                                                        | CH <sub>3</sub> CH <sub>3</sub> | C 0.00000000 0.00000000 0.76357800<br>H 0.50786800 0.88018600 1.16108900<br>H -1.01619700 -0.00026700 1.16108900<br>H 0.50832900 -0.87991900 1.16108900<br>C 0.00000000 0.00000000 -0.76357800<br>H 1.01619700 -0.00026700 -1.16108900<br>H -0.50832900 -0.87991900 -1.16108900<br>H -0.50786800 0.88018600 -1.16108900 |
| CH <sub>3</sub> CH <sub>2</sub> | C -0.00911100 -0.69144100 0.00000000<br>H -0.50272000 -1.09865800 0.88457200<br>H -0.50272000 -1.09865800 -0.88457200<br>H 1.01156100 -1.10210100 0.00000000<br>C -0.00911100 0.79211500 0.00000000<br>H 0.05160500 1.34768700 0.92437200<br>H 0.05160500 1.34768700 -0.92437200 | CH <sub>2</sub> CH <sub>2</sub> | C 0.00000000 -0.66235600 -0.00001900<br>H 0.92059600 -1.23177900 -0.00011100<br>H -0.92069400 -1.23155000 0.00022400<br>C 0.00000000 0.66235600 -0.00001900<br>H 0.92069400 1.23155000 0.00022400<br>H -0.92059600 1.23177900 -0.00011100                                                                               |
| CH <sub>3</sub> CH              | C -0.86048000 0.19954200 -0.00018500<br>H -1.30212200 -0.81543700 -0.00014100<br>C 0.59078300 -0.00312300 -0.00023200<br>H 0.86441900 -0.63131500 0.86456900<br>H 0.86643700 -0.63818100 -0.85923700<br>H 1.18945300 0.90642300 -0.00268300                                      | CH <sub>3</sub> C               | C 0.50059800 0.01359000 -0.00000400<br>H 1.00602400 0.98891500 -0.00015700<br>H 0.82829200 -0.57737400 -0.87102600<br>H 0.82843100 -0.57711500 0.87114900<br>C -0.94438900 0.01400500 0.00000900                                                                                                                        |
| CH <sub>2</sub> CH              | C -0.59497200 0.00028400 0.00021400<br>H -1.18305300 -0.92117000 -0.00033100<br>H -1.18847700 0.91758500 -0.00033300<br>C 0.69691500 0.00024500 -0.00016700<br>H 1.75987300 0.00041100 0.00038300                                                                                | H <sub>2</sub> O                | O 0.00000000 0.00000000 0.11697300<br>H 0.00000000 0.76339900 -0.46789400<br>H 0.00000000 -0.76339900 -0.46789400                                                                                                                                                                                                       |

TABLE VIII. Positions of different atoms of the optimized structures of different anions in Cartesian coordinates.

| Species                                        | Atoms and their coordinates                                                                                                                                                                                                                                                                                               | Species                                         | Atoms and their coordinates                                                                                                                                                                                                                                                                                           |
|------------------------------------------------|---------------------------------------------------------------------------------------------------------------------------------------------------------------------------------------------------------------------------------------------------------------------------------------------------------------------------|-------------------------------------------------|-----------------------------------------------------------------------------------------------------------------------------------------------------------------------------------------------------------------------------------------------------------------------------------------------------------------------|
| CH <sub>3</sub> CH <sub>2</sub> O <sup>-</sup> | C 0.99467500 -0.66841100 0.00000000<br>H 0.82159500 -1.29029100 0.88426600<br>H 2.04360700 -0.33157600 0.00000000<br>H 0.82159500 -1.29029100 -0.88426600<br>C 0.00000000 0.53011700 0.00000000<br>H 0.31392600 1.16440200 0.88805600<br>H 0.31392600 1.16440200 -0.88805600<br>O -1.28533700 0.17664000 0.00000000       | CH <sub>2</sub> CH <sub>2</sub> OH <sup>-</sup> | C -1.35098500 0.05069000 0.00000000<br>H -1.72703200 -0.40170700 0.91553500<br>H -1.72703200 -0.40170700 -0.91553500<br>C 0.00000000 0.52777500 0.00000000<br>H 0.25160400 1.10800100 0.89574600<br>H 0.25160400 1.10800100 -0.89574600<br>O 1.13444800 -0.59543700 0.00000000<br>H 1.98118500 -0.11987800 0.00000000 |
| CH <sub>3</sub> CHOH <sup>-</sup>              | C 1.20476100 -0.21337700 0.00511400<br>H 1.24641900 -0.75686600 0.98541100<br>H 2.07947500 0.44749500 -0.03892500<br>H 1.34300900 -0.97705500 -0.76779300<br>C -0.05533900 0.60545800 -0.19930100<br>H -0.06908900 1.38623800 0.57653800<br>O -1.22537900 -0.26400400 0.13747300<br>H -1.69331400 -0.34027400 -0.68989400 | CH <sub>2</sub> CH <sub>2</sub> O <sup>-</sup>  | C 1.18640000 -0.12888400 0.00007100<br>H 1.45288100 -0.66002200 -0.91208200<br>H 1.45223900 -0.66150700 0.91155400<br>C -0.16066600 0.55413000 0.00009900<br>H -0.23826200 1.22938300 -0.88731100<br>H -0.23830700 1.22890400 0.88786000<br>O -1.07286900 -0.46103000 -0.00013000                                     |
| CH <sub>3</sub> CHO <sup>-</sup>               | O 1.24036800 -0.27077100 -0.00004200<br>C 0.22705300 0.39139900 0.00015200<br>H 0.29223600 1.49647400 -0.00019000<br>C -1.16512600 -0.15085000 0.00004000<br>H -1.70658800 0.23356000 0.87290300<br>H -1.70531300 0.23169200 -0.87463000<br>H -1.17484000 -1.23885100 0.00109600                                          | CHCH <sub>2</sub> OH <sup>-</sup>               | O 1.13490400 -0.33791000 0.00000800<br>H 1.84568300 0.31386800 -0.00004700<br>C -0.12541100 0.43514300 0.00000000<br>H -0.07533700 1.10542100 0.89108300<br>H -0.07532400 1.10544800 -0.89106300<br>C -1.30345500 -0.44025200 -0.00001200<br>H -2.20105500 0.20919900 0.00003000                                      |
| CH <sub>2</sub> CHOH <sup>-</sup>              | C 1.22918200 -0.17463700 0.00010600<br>H 2.11410600 0.44661500 -0.00015700<br>H 1.34792500 -1.24876100 0.00030600<br>C 0.03021500 0.40170200 -0.00002100<br>H -0.07701300 1.48179200 -0.00033800<br>O -1.13142500 -0.29515100 -0.00024800<br>H -1.89000300 0.31917000 0.00165700                                          | CH <sub>3</sub> COH <sup>-</sup>                | C 1.17581000 -0.13721700 -0.00000400<br>H 1.25762700 -0.81061200 -0.88554800<br>H 1.25767000 -0.81056700 0.88556600<br>H 2.05398700 0.51302800 -0.00003800<br>C -0.07937200 0.67889500 0.00000600<br>O -1.15043200 -0.29728300 0.00000800<br>H -1.94444800 0.23634300 -0.00006200                                     |
| CH <sub>2</sub> CHO <sup>-</sup>               | C 1.17928700 -0.16989800 0.00001500<br>H 1.35232800 -1.24153800 -0.00010100<br>H 2.03551500 0.49473800 0.00006800<br>C -0.09751600 0.35431500 -0.00001800<br>H -0.10969500 1.47755000 -0.00005400<br>O -1.22109600 -0.22965600 0.00001300                                                                                 | CH <sub>3</sub> CH <sub>2</sub> <sup>-</sup>    | C -0.05540600 -0.68638600 0.00000000<br>H -0.58518600 -1.08596600 0.87264700<br>H -0.58518600 -1.08596600 -0.87264700<br>H 0.94221400 -1.21226900 0.00000000<br>C -0.05540600 0.83548400 0.00000000<br>H 0.44651300 1.24480900 0.88771300<br>H 0.44651300 1.24480900 -0.88771300                                      |
| OH <sup>-</sup>                                | O 0.00000000 0.00000000 0.10727800<br>H 0.00000000 0.00000000 -0.85822800                                                                                                                                                                                                                                                 |                                                 |                                                                                                                                                                                                                                                                                                                       |

TABLE IX. Positions of different atoms of the optimized structures of different cations in Cartesian coordinates.

| Species                            | Atoms and their coordinates                                                                                                                                                                                                                                                                                               | Species                             | Atoms and their coordinates                                                                                                                                                                                                                                                                                           |
|------------------------------------|---------------------------------------------------------------------------------------------------------------------------------------------------------------------------------------------------------------------------------------------------------------------------------------------------------------------------|-------------------------------------|-----------------------------------------------------------------------------------------------------------------------------------------------------------------------------------------------------------------------------------------------------------------------------------------------------------------------|
| $\text{CH}_3\text{CH}_2\text{O}^+$ | C 0.98671600 -0.76051900 0.00000000<br>H 0.77168800 -1.32072600 0.90501500<br>H 1.98053900 -0.31701800 0.00000000<br>H 0.77168800 -1.32072600 -0.90501500<br>C 0.00000000 0.55357100 0.00000000<br>H 0.23215300 1.16767600 0.91166100<br>H 0.23215300 1.16767600 -0.91166100<br>O -1.23856500 0.23310100 0.00000000       | $\text{CH}_2\text{CH}_2\text{OH}^+$ | C -0.74599200 0.46551900 0.00000000<br>H -1.27586800 0.63550600 0.92719600<br>H -1.27586800 0.63550600 -0.92719600<br>C 0.74624200 0.46655100 0.00000000<br>H 1.27438400 0.63590800 0.92808500<br>H 1.27438400 0.63590800 -0.92808500<br>O 0.00000000 -0.79579000 0.00000000<br>H 0.00146400 -1.76892400 0.00000000   |
| $\text{CH}_3\text{CHOH}^+$         | C 1.19399900 -0.18242300 -0.00000600<br>H 1.75287500 0.19708400 0.86712300<br>H 1.75374300 0.19774900 -0.86616900<br>H 1.16718700 -1.27004200 -0.00049500<br>C -0.10982700 0.44997600 -0.00013000<br>H -0.21125600 1.53460000 0.00005100<br>O -1.22400500 -0.14296200 0.00004700<br>H -1.17554600 -1.12101500 -0.00006900 | $\text{CH}_3\text{CO}^+$            | C -1.20965800 0.00041200 0.00003000<br>H -1.55439500 -0.47311700 -0.92654000<br>H -1.55654200 1.03826500 0.05499500<br>H -1.55446900 -0.56868000 0.87124800<br>C 0.21559000 0.00025700 0.00003300<br>O 1.32872700 -0.00006100 -0.00001000                                                                             |
| $\text{H}_2^+$                     | H 0.00000000 0.00000000 0.55766900<br>H 0.00000000 0.00000000 -0.55766900                                                                                                                                                                                                                                                 | $\text{CH}_3\text{CH}_3^+$          | C 0.00000000 0.72422400 0.00000000<br>H -0.35494300 1.14486100 -0.95719100<br>H -0.35494200 1.14486000 0.95719100<br>H 0.99805200 1.27920500 0.00000100<br>C 0.00000000 -0.72422400 0.00000000<br>H 0.35494300 -1.14486100 -0.95719100<br>H 0.35494200 -1.14486000 0.95719100<br>H -0.99805200 -1.27920500 0.00000100 |
| $\text{CH}_3\text{CH}_2^+$         | C -0.06417600 -0.68799600 0.00000000<br>H -0.07442700 -1.24371700 0.93233700<br>H -0.07442700 -1.24371700 -0.93233700<br>H 1.06028500 -0.00339000 0.00000000<br>C -0.06417600 0.68881500 0.00000000<br>H -0.07066000 1.24295500 0.93308900<br>H -0.07066000 1.24295500 -0.93308900                                        | $\text{CH}_2\text{CH}_2^+$          | C 0.00000000 -0.69380100 0.00001200<br>H 0.90270900 -1.25672400 -0.23105500<br>H -0.90253700 -1.25700200 0.23098400<br>C 0.00000000 0.69380100 0.00001200<br>H 0.90253700 1.25700200 0.23098400<br>H -0.90270900 1.25672400 -0.23105500                                                                               |
| $\text{CH}_3\text{CH}^+$           | C -0.78371300 0.15511500 -0.00011100<br>H -1.67963000 -0.46651400 -0.00058100<br>C 0.58765000 -0.00339700 -0.00040300<br>H 0.83049300 -0.67035200 0.86277800<br>H 0.83280300 -0.67881000 -0.85596700<br>H 1.19271200 0.90536600 -0.00314800                                                                               | $\text{CH}_3\text{C}^+$             | C 0.00000000 0.00000000 -0.47103600<br>H 0.00000000 1.05891800 -0.82465500<br>H -0.91705000 -0.52945900 -0.82465500<br>H 0.91705000 -0.52945900 -0.82465500<br>C 0.00000000 0.00000000 0.88336300                                                                                                                     |
| $\text{CH}_2\text{CH}^+$           | C -0.57903300 -0.00003200 0.00008500<br>H -1.15473300 -0.93783900 -0.00017100<br>H -1.15385900 0.93835900 -0.00017000<br>C 0.67176400 -0.00003700 -0.00003100<br>H 1.75221100 -0.00010500 0.00001600                                                                                                                      |                                     |                                                                                                                                                                                                                                                                                                                       |
